# Supplementary material
Source: PubMed Central journal article supplement (PMC3898622)
Supplement: NIHMS49176-supplement.pdf [file NIHMS49176-supplement.pdf]

Online Supporting Material

Supplemental Table 1. mRNA relative expression levels for selected cytokines in rat lung homogenates of *M. tuberculosis*-infected rats treated with RA

| Cytokine     | Week after infection | Relative intensity <sup>1</sup> |                | P for treatment |
|--------------|----------------------|---------------------------------|----------------|-----------------|
|              |                      | Control                         | RA+            |                 |
| IFN $\gamma$ | 1                    | 1.1 $\pm$ 0.1                   | 1.7 $\pm$ 0.1  | 0.001           |
|              | 3                    | 2.5 $\pm$ 0.1                   | 2.8 $\pm$ 0.1  |                 |
|              | 5                    | 5.8 $\pm$ 0.3                   | 15.1 $\pm$ 1.1 |                 |
| TNF $\alpha$ | 1                    | 0.7 $\pm$ 0.01                  | 0.3 $\pm$ 0.01 | 0.001           |
|              | 3                    | 0.4 $\pm$ 0.01                  | 1.1 $\pm$ 0.01 |                 |
|              | 5                    | 0.4 $\pm$ 0.01                  | 1.0 $\pm$ 0.1  |                 |
| iNOS         | 1                    | 0.03 $\pm$ 0.00                 | 0.1 $\pm$ 0.01 | 0.001           |
|              | 3                    | 0.12 $\pm$ 0.01                 | 0.6 $\pm$ 0.03 |                 |
|              | 5                    | 1.5 $\pm$ 0.01                  | 11.6 $\pm$ 1.0 |                 |
| IL-1 $\beta$ | 1                    | 0.02 $\pm$ 0.00                 | 0.1 $\pm$ 0.01 | 0.001           |
|              | 3                    | 0.7 $\pm$ 0.02                  | 1.7 $\pm$ 0.01 |                 |
|              | 5                    | 0.5 $\pm$ 0.01                  | 1.1 $\pm$ 0.01 |                 |
| IL-2         | 1                    | 2.2 $\pm$ 0.2                   | 5.5 $\pm$ 0.04 | 0.001           |
|              | 3                    | 0.9 $\pm$ 0.02                  | 1.6 $\pm$ 0.01 |                 |
|              | 5                    | 0.5 $\pm$ 0.01                  | 1.1 $\pm$ 0.00 |                 |

|          |   |                 |                 |       |
|----------|---|-----------------|-----------------|-------|
| IL-4     |   |                 |                 |       |
|          | 1 | 0               | $0.1 \pm 0.01$  |       |
|          | 3 | $2.0 \pm 0.01$  | $3.5 \pm 0.02$  |       |
|          | 5 | $1.7 \pm 0.01$  | $1.4 \pm 0.01$  |       |
| IL-6     |   |                 |                 |       |
|          | 1 | 0               | $0.03 \pm 0.00$ |       |
|          | 3 | $6.6 \pm 0.02$  | $2.9 \pm 0.02$  |       |
|          | 5 | $11.0 \pm 0.1$  | $6.6 \pm 0.1$   |       |
| IL-10    |   |                 |                 |       |
|          | 1 | $0.04 \pm 0.00$ | $0.2 \pm 0.00$  |       |
|          | 3 | $7.5 \pm 0.03$  | $5.0 \pm 0.5$   |       |
|          | 5 | $4.6 \pm 0.02$  | $5.0 \pm 0.03$  |       |
| IL-12p40 |   |                 |                 |       |
|          | 1 | $1.8 \pm 0.01$  | $5.0 \pm 0.04$  | 0.001 |
|          | 3 | $7.2 \pm 0.03$  | $3.2 \pm 0.03$  | 0.001 |
|          | 5 | $3.0 \pm 0.01$  | $4.1 \pm 0.03$  |       |
| IP-10    |   |                 |                 |       |
|          | 1 | $1.1 \pm 0.01$  | $3.4 \pm 0.2$   | 0.001 |
|          | 3 | $1.5 \pm 0.01$  | $1.6 \pm 0.1$   |       |
|          | 5 | $12.4 \pm 1.1$  | $21.4 \pm 2.0$  |       |

---

<sup>1</sup>Relative to GAPDH mRNA for the same sample. Values are the means  $\pm$  SEM for  $n = 3$  rats. Differences due to RA were evaluated for each time by  $t$ -test. As the kinetics of these cytokines are known to differ, time was not evaluated as a factor.

Online Supporting Material

Supplemental Table 2. mRNA relative expression levels for selected cytokines in rat spleen homogenates of *M. tuberculosis*-infected rats treated with RA

| Cytokine     | Week after infection | Relative intensity <sup>1</sup> |                | P for treatment |
|--------------|----------------------|---------------------------------|----------------|-----------------|
|              |                      | Control                         | RA+            |                 |
| IFN $\gamma$ | 1                    | 1.3 $\pm$ 0.1                   | 5.3 $\pm$ 0.02 | 0.001           |
|              | 3                    | 2.2 $\pm$ 0.2                   | 0.8 $\pm$ 0.1  |                 |
|              | 5                    | 0.7 $\pm$ 0.1                   | 0.3 $\pm$ 0.02 |                 |
| TNF $\alpha$ | 1                    | 0.5 $\pm$ 0.05                  | 4.5 $\pm$ 0.4  | 0.001           |
|              | 3                    | 0.6 $\pm$ 0.05                  | 0.7 $\pm$ 0.1  |                 |
|              | 5                    | 0.4 $\pm$ 0.02                  | 0.3 $\pm$ 0.03 |                 |
| iNOS         | 1                    | 1.4 $\pm$ 0.1                   | 3.1 $\pm$ 0.03 | 0.001           |
|              | 3                    | 0.8 $\pm$ 0.1                   | 1.0 $\pm$ 0.1  |                 |
|              | 5                    | 1.6 $\pm$ 0.1                   | 0.5 $\pm$ 0.03 |                 |
| IL-1 $\beta$ | 1                    | 2.0 $\pm$ 0.2                   | 11.9 $\pm$ 1.2 | 0.001           |
|              | 3                    | 1.6 $\pm$ 0.1                   | 0.6 $\pm$ 0.04 |                 |
|              | 5                    | 0.8 $\pm$ 0.1                   | 0.2 $\pm$ 0.02 |                 |
| IL-2         | 1                    | 0                               | 5.8 $\pm$ 0.5  | 0.001           |
|              | 3                    | 0                               | 0.7 $\pm$ 0.1  |                 |
|              | 5                    | 0                               | 0.2 $\pm$ 0.01 |                 |

|          |   |                |                |       |
|----------|---|----------------|----------------|-------|
| IL-4     |   |                |                |       |
|          | 1 | $0.9 \pm 0.1$  | $1.1 \pm 0.1$  |       |
|          | 3 | $0.5 \pm 0.04$ | $0.7 \pm 0.1$  |       |
|          | 5 | $0.2 \pm 0.02$ | $0.5 \pm 0.03$ | 0.001 |
| IL-6     |   |                |                |       |
|          | 1 | $1.1 \pm 0.1$  | $1.0 \pm 0.1$  |       |
|          | 3 | $0.8 \pm 0.1$  | $1.1 \pm 0.1$  |       |
|          | 5 | $1.0 \pm 0.1$  | $0.7 \pm 0.1$  |       |
| IL-10    |   |                |                |       |
|          | 1 | $2.1 \pm 0.2$  | $1.4 \pm 0.1$  |       |
|          | 3 | $1.1 \pm 0.1$  | $1.7 \pm 0.2$  |       |
|          | 5 | $1.1 \pm 0.1$  | $1.3 \pm 0.1$  |       |
| IL-12p40 |   |                |                |       |
|          | 1 | $1.3 \pm 0.1$  | $1.3 \pm 0.1$  |       |
|          | 3 | $1.7 \pm 0.2$  | $1.5 \pm 0.2$  |       |
|          | 5 | $0.9 \pm 0.1$  | $1.3 \pm 0.1$  |       |
| IP-10    |   |                |                |       |
|          | 1 | $1.0 \pm 0.1$  | $0.7 \pm 0.1$  |       |
|          | 3 | $1.0 \pm 0.1$  | $1.1 \pm 0.1$  |       |
|          | 5 | $0.9 \pm 0.1$  | $0.8 \pm 0.1$  |       |

---

<sup>1</sup>Relative to GAPDH mRNA for the same sample. Values are the means  $\pm$  SEM for  $n = 3$  rats. Differences due to RA were evaluated for each time by *t*-test. As the kinetics of these cytokines are known to differ, time was not evaluated as a factor.
